# Supplementary material
Source: Springer Nature journal article supplement (https://www.springermedizin.de/resource/supplementary/13058_2005_1349_MOESM8_ESM.pdf/9698916)

# S-8: Frequency Analysis of Alterations in 7 Cell Lines

Scale bars to the right each chromosome denote +1.0 and +0.5 log<sub>2</sub> ratio scale references while those to the left represent -1.0 and -0.5 log<sub>2</sub> ratio scale references.

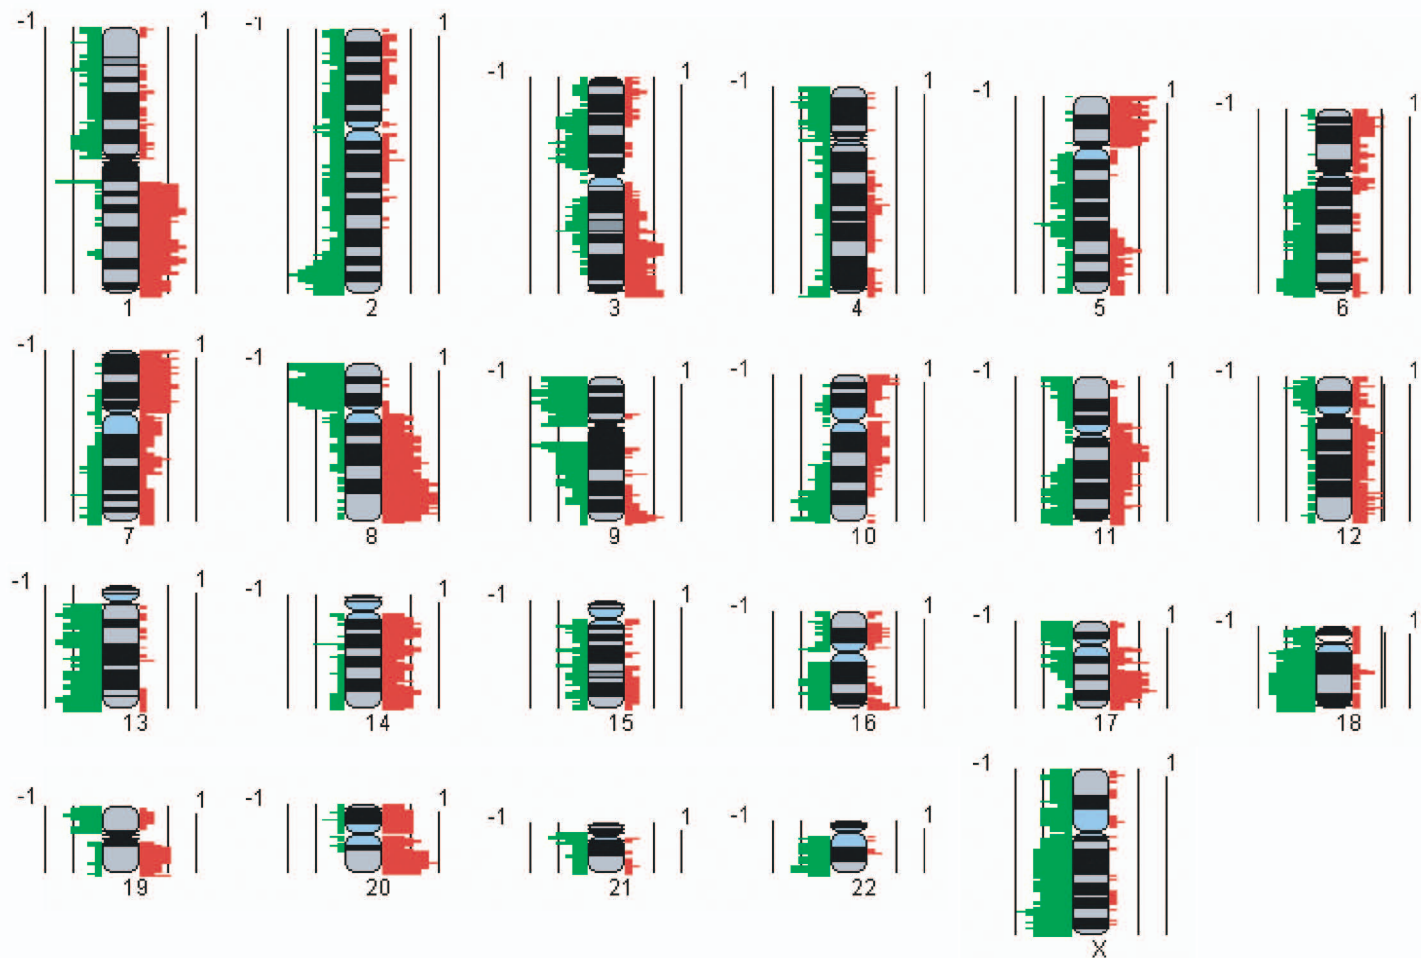

Supplement: MOESM8 [file 9698916]
